# Supplementary material
Source: publisher site journal article supplement (https://www.spandidos-publications.com/620/downloadSupplementary)
Supplement: Supplementary file 1 [file downloadSupplementary]

Figure S1. Protein structural analysis. (A and C) Predicted wild-type (NM\_201647) and (B and D) mutated protein structures of the STAM binding protein through *in silico* analysis; the mutated p.Gln323Arg affected the amino acid side chain (pink).

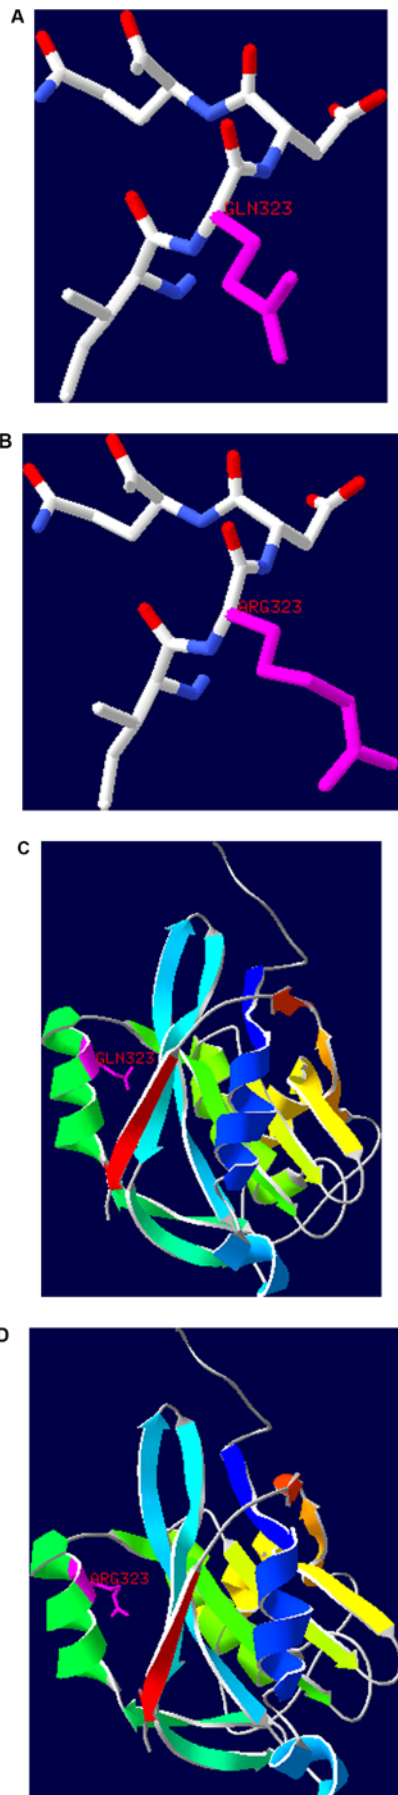

Video S1. Involuntary movement of the tongue and mouth.
